# Supplementary material for: Spatiotemporal expression of HMGB2 regulates cell proliferation and hepatocyte size during liver regeneration
Source: PubMed Central journal article supplement (PMC9279446; doi:10.1038/s41598-022-16258-4), 2022-07-13
Supplement: 41598_2022_16258_MOESM1_ESM.pdf [file 41598_2022_16258_MOESM1_ESM.pdf]

# **Spatiotemporal expression of HMGB2 regulates cell proliferation and hepatocyte size during liver regeneration**

Koichi Yano<sup>1,2</sup>, Narantsog Chojjookhuu<sup>1</sup>, Makoto Ikenoue<sup>1,2</sup>, Fidya Fidya<sup>1</sup>, Tomohiro Fukaya<sup>3</sup>, Katsuaki Sato<sup>3</sup>, Deokcheol Lee<sup>4</sup>, Noboru Taniguchi<sup>5</sup>, Etsuo Chosa<sup>4</sup>, Atsushi Nanashima<sup>2</sup> and Yoshitaka Hishikawa<sup>1\*</sup>

<sup>1</sup>Department of Anatomy, Histochemistry and Cell Biology, Faculty of Medicine, University of Miyazaki, 5200 Kihara, Kiyotake, Miyazaki 889-1692, Japan

<sup>2</sup>Department of Surgery, Faculty of Medicine, University of Miyazaki, Miyazaki 889-1692, Japan

<sup>3</sup>Division of Immunology, Department of Infectious Diseases, Faculty of Medicine, University of Miyazaki, Miyazaki, Japan

<sup>4</sup>Department of Orthopaedic Surgery, Faculty of Medicine, University of Miyazaki, 5200 Kihara, Kiyotake, Miyazaki 889-1692, Japan

<sup>5</sup>Department of Orthopaedic Surgery, Graduate School of Medical and Dental Sciences, Kagoshima University, 8-35-1 Sakuragaoka, Kagoshima 890-8520, Japan

**Running title:** The role of HMGB2 during liver regeneration

## **Correspondence:**

\*Yoshitaka Hishikawa, M.D., Ph.D.,

Department of Anatomy, Histochemistry and Cell Biology, Faculty of Medicine,

University of Miyazaki, 5200 Kihara, Kiyotake, Miyazaki 889-1692, Japan. Tel: +81-985-85-1783. Fax: +81-985-85-9851 E-mail: [yhishi@med.miyazaki-u.ac.jp](mailto:yhishi@med.miyazaki-u.ac.jp)

Supplementary figure S1

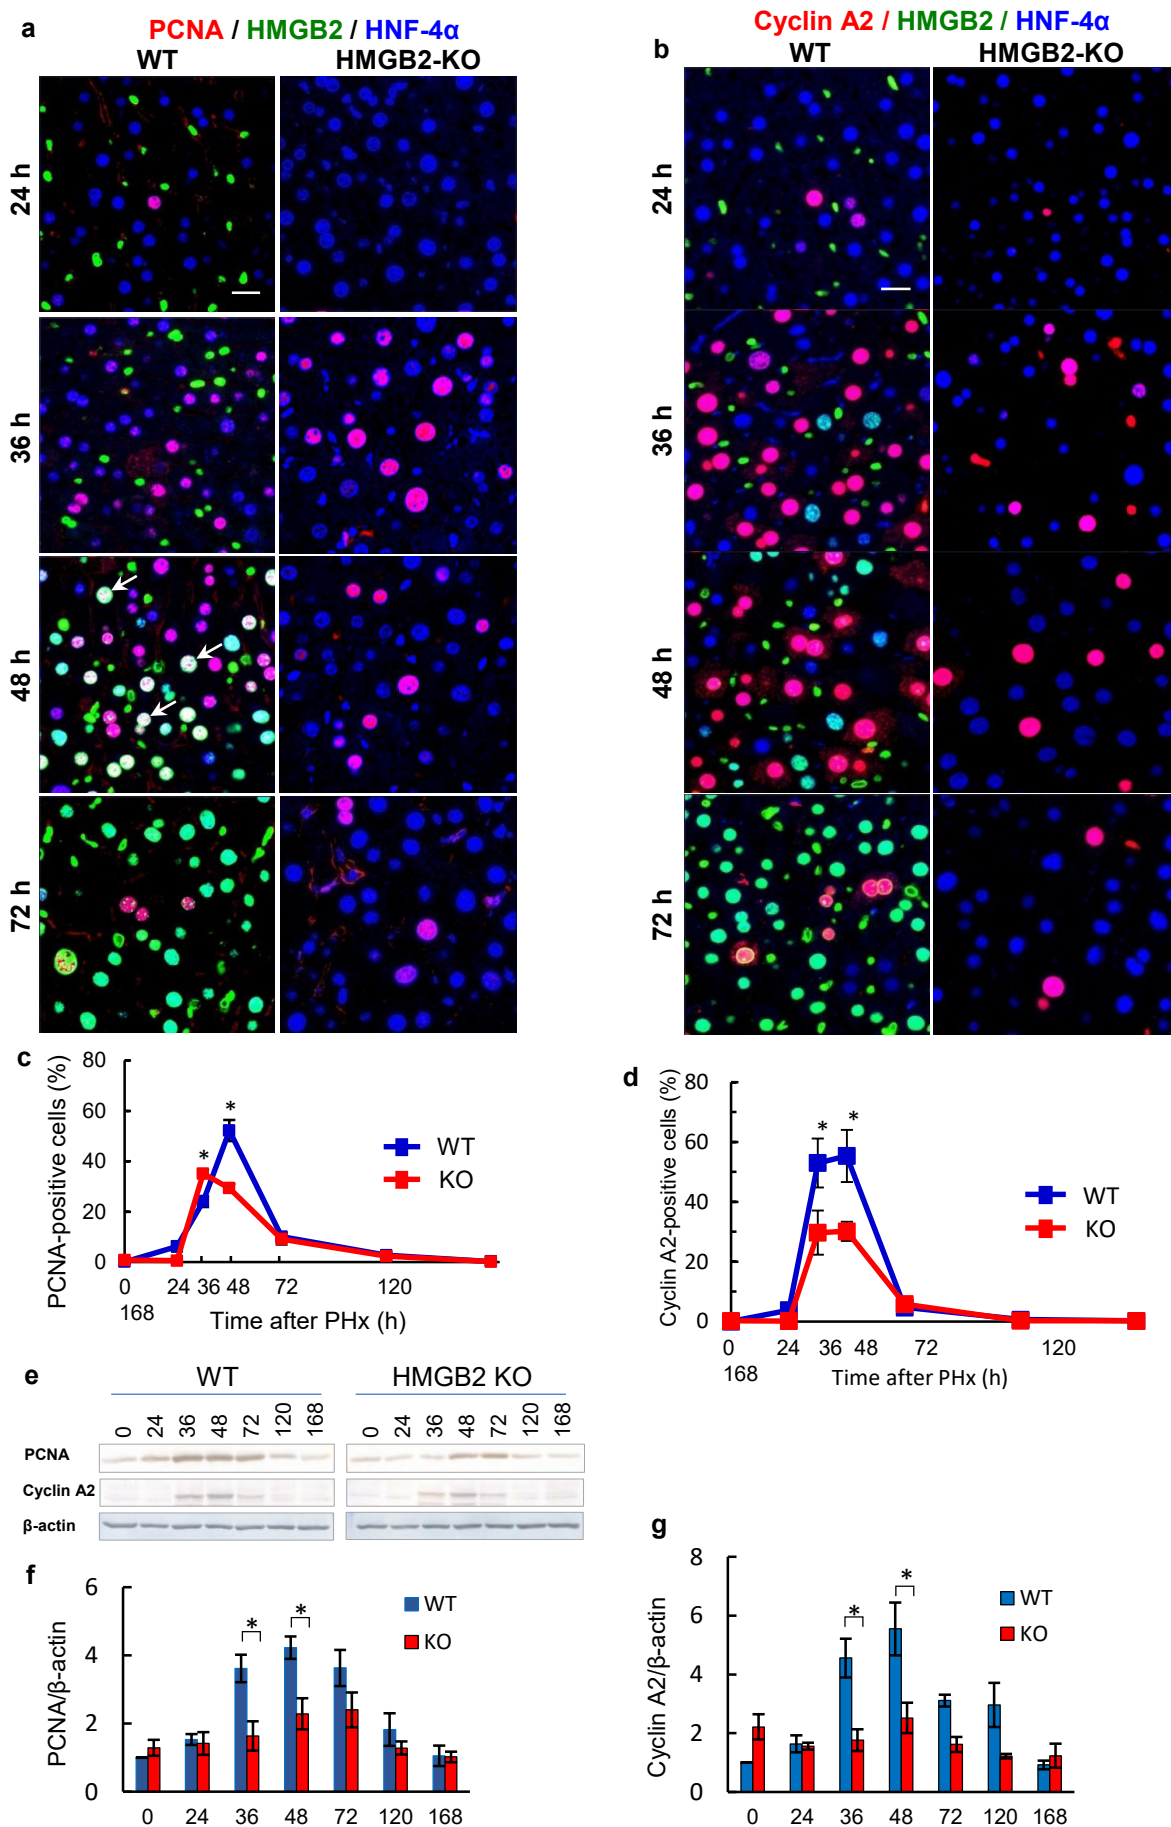

Supplementary figure S2

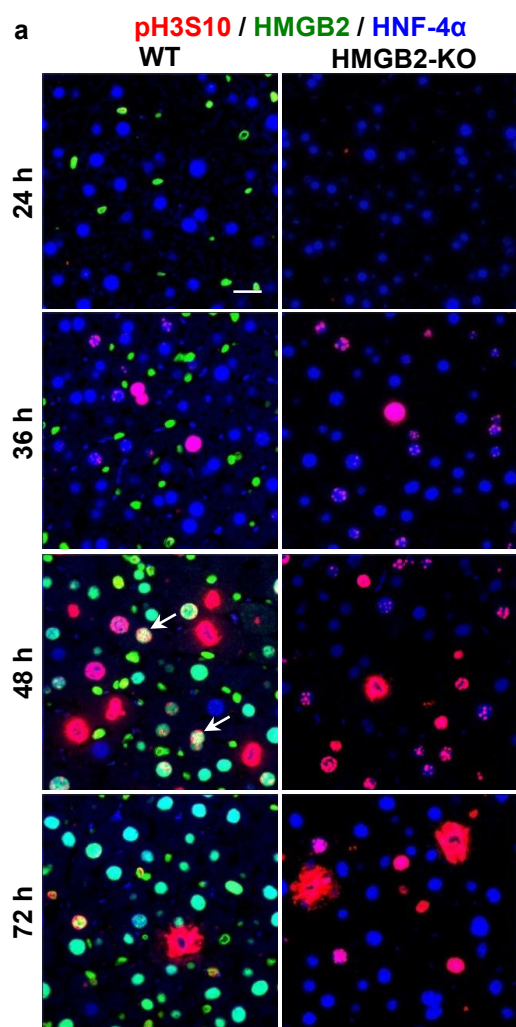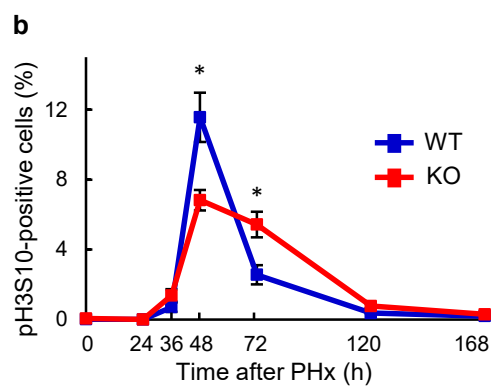

Supplementary figure S3

a

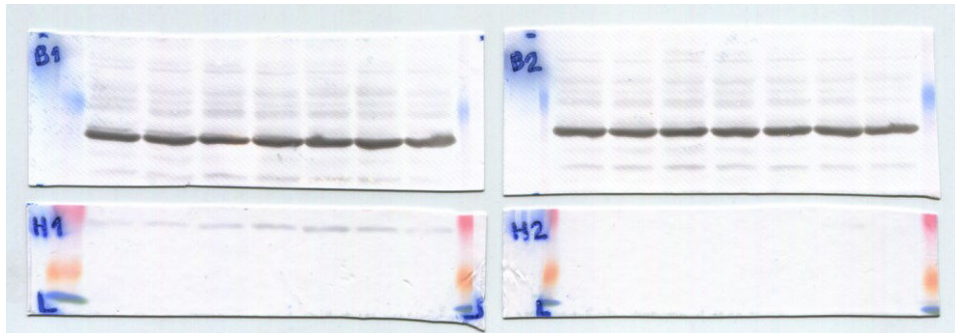

b

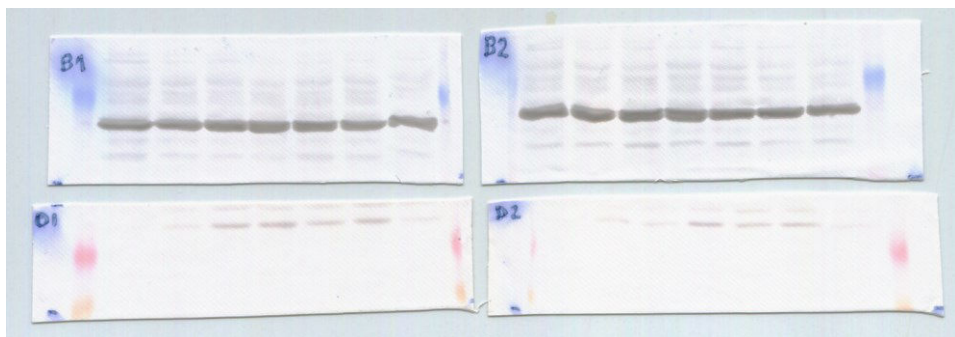

c

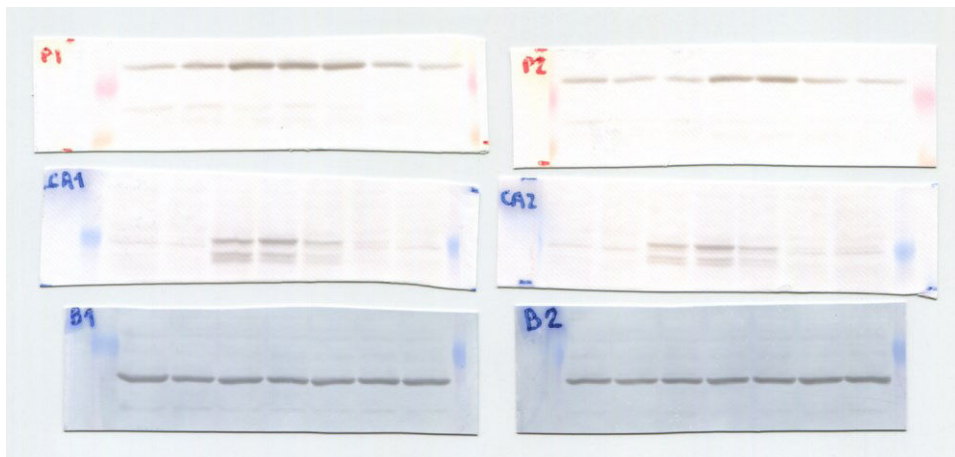

### **Supplementary figure S1.**

PCNA and Cyclin A2 expression in mouse liver during regeneration. **(a)** Immunofluorescence for PCNA (red), HMGB2 (green) and HNF-4 $\alpha$  (blue) in WT and HMGB2-KO mouse livers after PHx. **(b)** Immunofluorescence for Cyclin A2 (red), HMGB2 (green) and HNF-4 $\alpha$  (blue) in WT and HMGB2-KO mouse livers after PHx. Arrows indicate HMGB2- and PCNA-positive hepatocytes. Scale bar 20  $\mu$ m. Counting results of PCNA- **(c)** and Cyclin A2-positive **(d)** cells in WT and HMGB2-KO mouse livers after PHx. Data represent the mean  $\pm$  SEM from 5-6 mice per group. **(e)** Western blotting of PCNA and Cyclin A2 in WT and HMGB2-KO mouse livers after PHx. Densitometry analysis of PCNA **(f)** and Cyclin A2 **(g)**. Data represent the mean  $\pm$  SEM from 3 mice per group. Asterisks indicate statistically significant differences (\* $p$ <0.05).

### **Supplementary figure S2.**

pH3S10 expression in mouse liver during regeneration. **(a)** Immunofluorescence for pH3S10 (red), HMGB2 (green) and HNF-4 $\alpha$  (blue) in WT and HMGB2-KO mouse livers after PHx. Arrows indicate HMGB2- and pH3S10-positive hepatocytes. Scale bar 20  $\mu$ m. **(b)** Counting results of pH3S10-positive cells in WT and HMGB2-KO mouse livers after PHx. Data represent the mean  $\pm$  SEM from 5-6 mice per group. Asterisks indicate statistically significant differences (\* $p$ <0.05).

### **Supplementary figure S3.**

Original images of western blotting that revealed in Fig. 2d, Fig. 4g and Supplementary figure S1e. Representative images of three independent experiments are revealed.
